# Supplementary material
Source: Springer Nature journal article supplement (https://www.springermedizin.de/resource/supplementary/12891_2012_1703_MOESM7_ESM.pdf/9508396)

**Locking Screw**

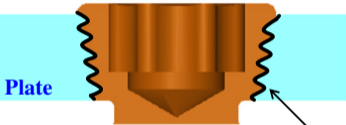

**(a)**

**Nonlocking Screw**

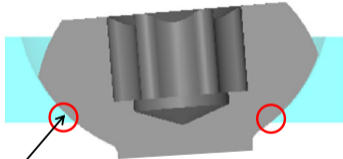

**(b)**

**Contact Area**

Supplement: MOESM7 [file 9508396]
